# Supplementary material
Source: publisher figshare collection journal article supplement (https://gsajournals.figshare.com/ndownloader/files/25816559)
Supplement: Supplementary file 1 [file 25816559]

**
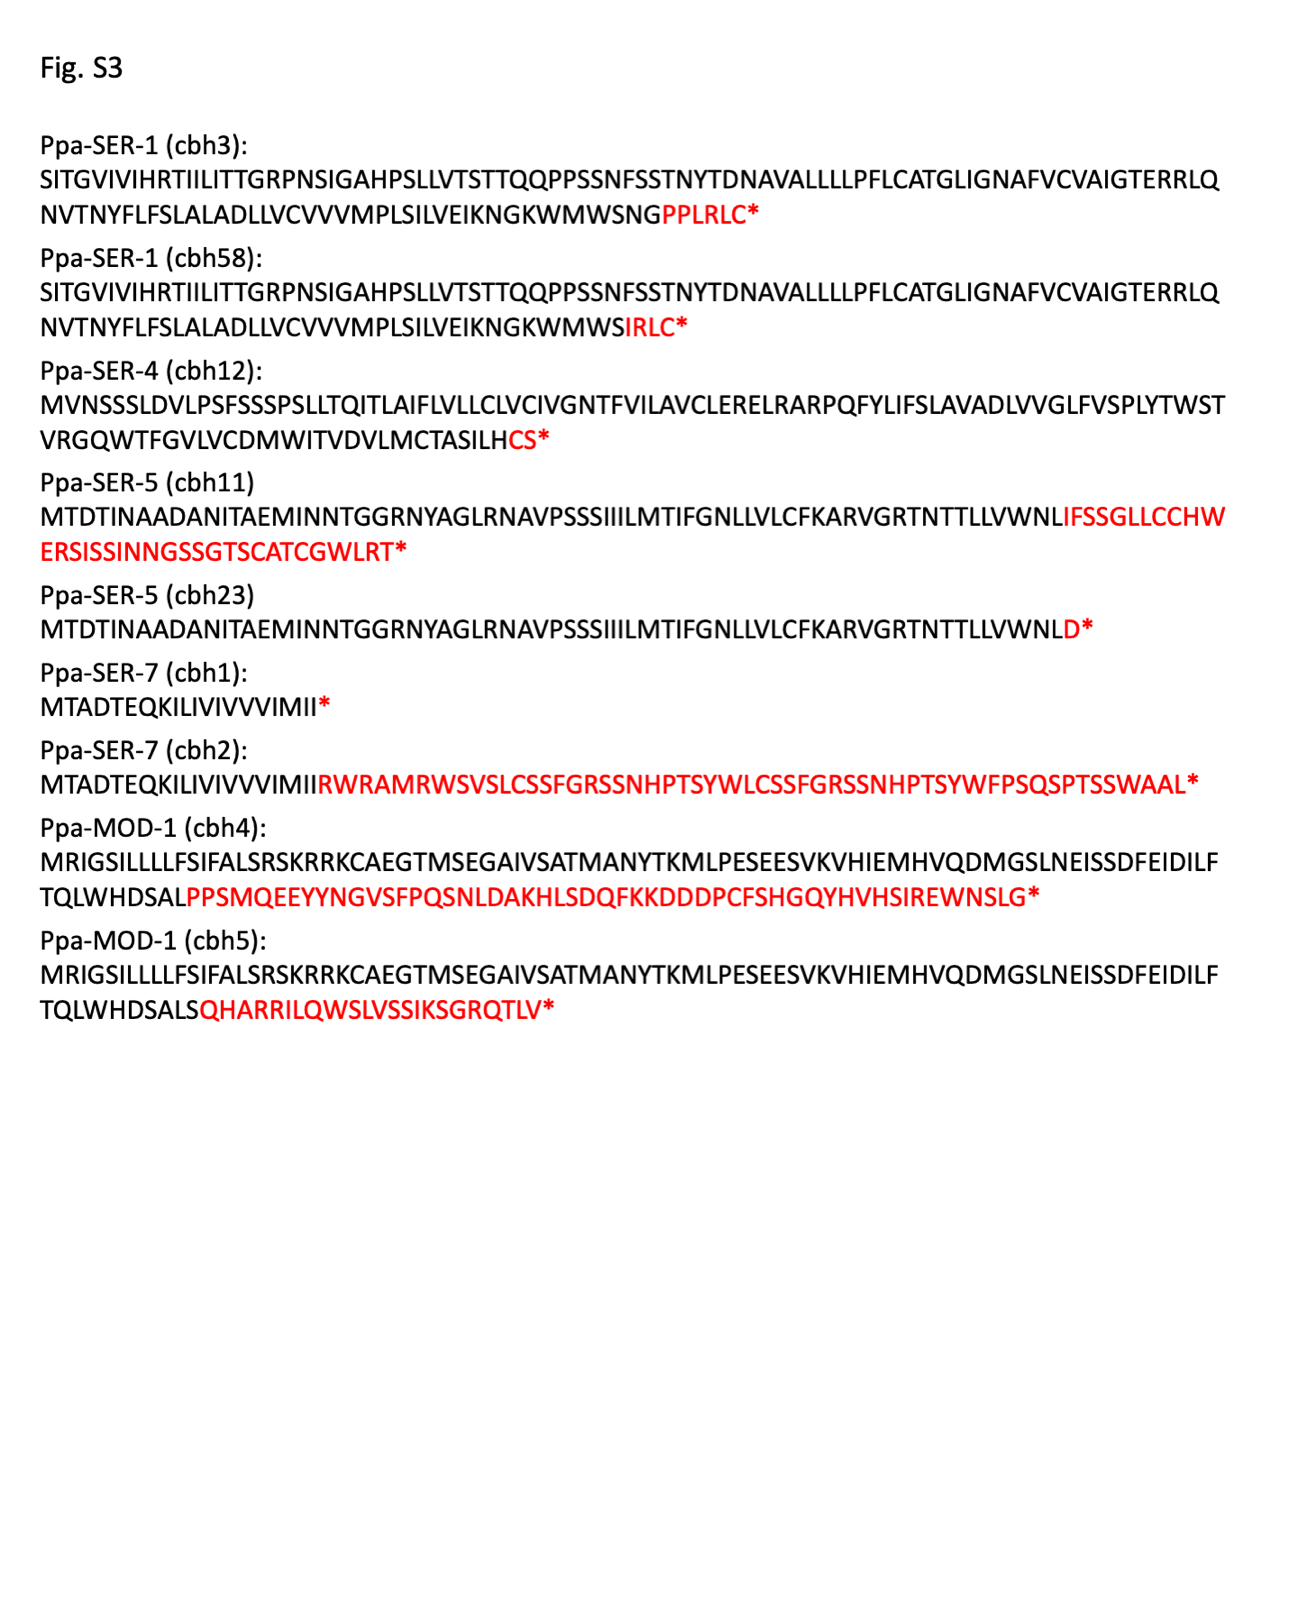
**

**Figure S3.** Predicted amino acid sequences of the serotonin receptor mutants.

All of the mutation caused by CRISPR/Cas9 brought frame-shifts in the serotonin receptors, causing premature stop codons. The black letters and red letters represent original amino acid sequences and amino acid sequences brought by the genome editing events, respectively.
